# Supplementary material for: Less berries and more pods: losers and winners of chronic disturbance in a tropical dry forest
Source: Research Square preprint supplement (doi:10.21203/rs.3.rs-3186450/v1), 2023-08-11
Supplement: Supplementary file 1 [file a22dcb6a258aaf8bf0e54f14.docx]

**Less berries and more pods: losers and winners of chronic disturbance in a tropical dry forest**

**Oecologia**

Carlos Iván Espinosa1,5, Andrea Jara-Guerrero1, Judith Castillo-Escobar2, Jorge Cueva-Ortiz3, Elizabeth Gusmán-Montalván1, Bernd Stimm3, Patrick Hildebrandt3, Adrián Escudero4.

1 EcoSs_Lab, Departamento de Ciencias Biológicas y Agropecuarias, Universidad Técnica Particular de Loja, Loja, Ecuador.

2 Maestría de Biología de la Conservación y Ecología Tropical, Departamento de Ciencias Biológicas y Agropecuarias, Universidad Técnica Particular de Loja, Loja, Ecuador.

3 Department of Life Science Systems, Technical University of Munich, Freising, Germany

4 Área de Biodiversidad y Conservación. Dep. de Biología, Geología y Física Aplicada. ESCET URJC, Móstoles, Madrid, Spain.

5Corresponding author: [ciespinosa@utpl.edu.ec](mailto:ciespinosa@utpl.edu.ec)

**Table S1** Morphological traits of woody species from the SDTF of Zapotillo, Southwestern Ecuador. Fruit type, fruit color, fruit area (mm), seed number per fruit, seed weight (g), seed area (mm), dispersal syndrome: zoochrory (Z); anemochory (AN); autochory (AU), and references (Ref.): *in situ* = fruits and seeds collected in the field*;* GB = germplasm bank of UTPL.

| **Family** | **Species** | **Fruit type** | **Fruit color** | **Fruit area** | **Fruit weight** | **No. Seeds/fruit** | **Seed weight** | **Seed area** | **Tree density** | **Dispersal syndrome** | **Ref.** |
| --- | --- | --- | --- | --- | --- | --- | --- | --- | --- | --- | --- |
| Achatocarpaceae | *Achatocarpus pubescens* | berry | white | 11.39 | 0.03 | 1 | 0.01 | 7.62 | 1.04 | Zoochory | 19, *in situ* |
| Anacardiaceae | *Loxopterygium huasango* | samara | brown | 57.57 | 0.01 | 1 | 0.00 | 8.93 | 1.43 | Anemochory | 19, *in situ* |
| Annonaceae | *Annona muricata* | berry | green | 18378.32 | 1529.70 | 137 | 99.30 | 11.00 | 0.08 | Zoochory | 20 |
| Asteraceae | *Fulcaldea laurifolia* | achene | red | 7.85 |  | 1 | 0.04 | 16.55 | 4.51 | Anemochory | 10, 19, 31 |
| Bignoniaceae | *Handroanthus billbergii* | capsule | brown | 1047.65 | 2.04 | 112 | 0.02 | 55.46 | 5.48 | Anemochory | 5, 19 |
| Bignoniaceae | *Handroanthus chrysanthus* | capsule | brown | 198.55 | 17.13 | 278 | 0.02 | 170.40 | 49.65 | Anemochory | 19, 23, GB |
| Bignoniaceae | *Tecoma stans* | capsule | brown | 659.73 |  |  | 0.02 | 71.15 | 4.86 | Anemochory | 19, 31, 45 |
| Boraginaceae | *Cordia alliodora* | samara | brown | 110.45 | 0.01 | 1 | 0.05 | 17.02 | 9.57 | Anemochory | 18, 19, 3, GB |
| Boraginaceae | *Cordia lutea* | drupe | white | 0.34 | 5.04 | 1 | 0.20 | 64.20 | 0.15 | Zoochory | 2, 19, GB |
| Boraginaceae | *Cordia macrantha* | drupe | brown | 34.95 |  | 1 |  |  | 0.08 | Anemochory | 19, 27 |
| Bixaceae | *Cochlospermum vitifolium* | capsule | brown | 3337.94 | 0.03 | 130 | 0.02 | 25.14 | 9.34 | Anemochory | 17,19,30, 43, GB |
| Burseraceae | *Bursera graveolens* | drupe | green | 83.45 | 0.25 | 1 | 0.09 | 9.76 | 13.70 | Zoochory | 19, 31 |
| Cactaceae | *Cereus diffusus* | berry | red | 81.68 | 110.00 | 50 |  | 4.71 | 4.17 | Zoochory | 19, 22, 32 |
| Cannabaceae | *Celtis iguanaea* | drupe | yellow | 113.88 | 0.90 | 1 | 0.29 | 49.16 | 0.19 | Zoochory | 7,13, 19, GB |
| Cannabaceae | *Celtis loxensis* | drupe | yellow | 86.39 | 0.90 | 1 | 0.29 | 49.16 | 2.43 | Zoochory | 13, 19 |
| Capparaceae | *Colicodendron scabridum* | berry | yellow | 3534.29 | 8.00 | 37 | 0.30 | 14.73 | 0.89 | Zoochory | 19, 28, 31 |
| Capparaceae | *Cynophalla flexuosa* | capsule | green | 466.53 | 0.87 | 9 | 0.12 | 21.99 | 2.04 | Zoochory | 19, 31, 36 |
| Caricaceae | *Carica parviflora* | berry | orange | 329.74 | 1.50 | 11 | 0.03 | 16.30 | 0.35 | Zoochory | 19, *in situ* |
| Combretaceae | *Terminalia valverdeae* | samara | brown | 1444.29 | 0.99 | 1 | 0.78 | 126.75 | 18.63 | Anemochory | 19, *in situ* |
| Convolvulaceae | *Ipomoea pauciflora* | capsule | green | 157.08 | 10.54 | 4 | 0.16 | 54.86 | 5.86 | Anemochory | 30, 37, GB |
| Erythroxylaceae | *Erythroxylum glaucum* | drupe | red | 37.56 | 0.17 | 1 | 0.11 | 28.08 | 5.90 | Zoochory | 19, *in situ* |
| Euphorbiaceae | *Croton sp.* | capsule | brown | 25.72 | 0.05 | 3 | 0.02 | 13.10 | 0.35 | Autochory | 5, 18, 30, 31 |
| Euphorbiaceae | *Jatropha curcas* | capsule | brown | 539.21 | 2.19 | 3 | 0.67 | 158.06 | 0.69 | Zoochory | 8, 19, 26, 31 |
| Fabaceae | *Vachellia macracantha* | pods | brown | 694.43 | 1.56 | 12 | 0.04 | 18.00 | 4.17 | Autochory | 19, *in situ* |
| Fabaceae | *Albizia multiflora* | pods | brown | 1524.94 | 8.42 | 14 | 0.15 | 46.15 | 3.24 | Autochory | 19, *in situ* |
| Fabaceae | *Bauhinia aculeata* | pods | brown | 2509.26 | 9.19 | 10 | 93.90 | 30.41 | 0.08 | Autochory | 19, 21, 30 |
| Fabaceae | *Caesalpinia glabrata* | pods | brown | 917.27 | 3.79 | 8 | 0.18 | 34.52 | 10.65 | Autochory | 19, *in situ* |
| Fabaceae | *Caesalpinia spinosa* | pods | red | 1178.10 | 1.75 | 10 | 0.24 | 58.84 | 0.69 | Autochory | 19, *in situ* |
| Fabaceae | *Centrolobium ochroxylum* | samara | brown | 7222.52 | 30.61 | 3 |  |  | 0.66 | Anemochory | 19, 25 |
| Fabaceae | *Chloroleucon mangense* | pods | black | 903.21 | 4.80 | 15 | 0.07 | 18.15 | 2.74 | Autochory | 1, 42, GB |
| Fabaceae | *Erythrina velutina* | pods | brown | 948.60 | 1.02 | 7 | 0.28 | 56.40 | 4.90 | Autochory | 19, 34, 35, GB |
| Fabaceae | *Geoffroea spinosa* | drupe | green | 889.35 | 13.35 | 1 | 5.56 | 535.94 | 10.49 | Zoochory | 19, *in situ* |
| Fabaceae | *Leucaena trichodes* | pods | brown | 3271.22 | 0.96 | 6 | 0.05 | 36.25 | 0.31 | Autochory | 1, 19, 31 |
| Fabaceae | *Machaerium millei* | samara | green | 580.30 | 0.45 | 1 |  | 25.92 | 5.25 | Anemochory | 19, 30, GB |
| Fabaceae | *Mimosa acantholoba* | pods | brown | 8933.90 |  | 6 | 0.02 | 14.43 | 9.72 | Autochory | 6, 19, 31, 54 |
| Fabaceae | *Mimosa pigra* | pods | brown | 706.86 |  | 22 | 0.00 | 9.42 | 0.69 | Autochory | 6, 55 |
| Fabaceae | *Myroxylon balsamun* | samara | yellow | 1413.72 | 0.75 | 1 | 0.70 |  | 0.12 | Anemochory | 4 |
| Fabaceae | *Piptadenia flava* | pods | brown | 1716.09 | 0.36 | 6 | 0.12 | 11.88 | 0.04 | Autochory | 5, 19, 46 |
| Fabaceae | *Piscidia carthagenensis* | pods | brown | 2496.05 | 0.61 | 5 | 0.07 | 31.49 | 36.19 | Anemochory | 19, *in situ* |
| Fabaceae | *Pithecellobium excelsum* | pods | red | 400.52 | 0.91 | 6 | 0.05 | 38.70 | 3.82 | Zoochory | 19, *in situ* |
| Fabaceae | *Prosopis juliflora* | pods | yellow | 1696.46 | 10.54 | 15 | 0.04 | 20.01 | 0.08 | Zoochory | 1, 19, GB |
| Fabaceae | *Senna bicapsularis* | pods | brown | 1083.85 | 9.69 | 55 | 0.01 | 7.52 | 0.04 | Autochory | 1, 19,GB |
| Fabaceae | *Senna incarnata* | pods | brown | 1192.76 | 0.43 | 16 | 0.01 | 8.55 | 0.04 | Autochory | 19, *in situ* |
| Fabaceae | *Senna mollissima* | pods | brown | 1570.80 | 9.69 | 41 | 0.07 | 24.67 | 0.12 | Autochory | 1, 19, 33, GB |
| Fabaceae | *Senna spectabilis* | pods | black | 1752.42 | 9.69 | 60 | 0.04 | 19.43 | 0.35 | Autochory | 1, 19, 33, GB |
| Malvaceae | *Cavanillesia platanifolia* | samara | brown | 765.76 | 0.00 | 1 | 0.90 | 297.48 | 0.23 | Anemochory | 1, 11, 19, GB |
| Malvaceae | *Ceiba insignis* | capsule | green | 5183.63 | 74.10 | 114 | 0.13 | 37.70 | 1.89 | Anemochory | 1, 4 |
| Malvaceae | *Ceiba trichistandra* | capsule | brown | 6636.61 | 137.56 | 55 | 0.19 | 53.80 | 4.55 | Anemochory | 19, GB |
| Malvaceae | *Eriotheca roseorum* | capsule | brown | 2356.19 |  | 16 | 0.27 | 20.57 | 0.31 | Anemochory | 9, 29 |
| Malvaceae | *Eriotheca ruizii* | capsule | brown | 186.70 | 0.48 | 13 | 0.03 | 9.27 | 16.36 | Anemochory | 1, 19, GB |
| Malvaceae | *Guazuma ulmifolia* | capsule | black | 245.44 | 2.37 | 54 | 0.01 | 4.17 | 0.39 | Zoochory | 12, 19, 41 |
| Meliaceae | *Trichilia hirta* | capsule | brown | 95.03 | 0.70 | 4 | 0.09 | 29.94 | 0.66 | Zoochory | 3 ,19, GB |
| Moraceae | *Ficus jacobii* | syconium | green | 133.52 | 19.00 | 50 | 0.00 | 0.79 | 0.77 | Zoochory | 19, *in situ* |
| Moraceae | *Ficus obtusifolia* | syconium | green | 51.78 | 0.31 | 38 | 0.00 | 0.58 | 0.12 | Zoochory | 17, 30 |
| Moraceae | *Maclura tinctoria* | berry | yellow | 6.28 | 2.50 | 50 | 0.00 | 5.05 | 1.93 | Zoochory | 19, 24, GB |
| Muntingiaceae | *Muntingia calabura* | berry | red | 40.84 | 1.45 | 5139 | 0.03 | 0.13 | 0.04 | Zoochory | 14, 15, 19, 44 |
| Myrtaceae | *Psidium guajaba* | berry | yellow | 2965.04 | 134.00 | 350 | 0.01 | 6.76 | 2.62 | Zoochory | 19, 38, 40, GB |
| Nyctaginaceae | *Bougainvillea peruviana* | achene | brown | 49.09 |  | 1 |  |  | 7.99 | Anemochory | 19, 50 |
| Nyctaginaceae | *Pisonia aculeata* | achene | brown | 70.69 |  | 1 | 0.06 | 28.84 | 5.21 | Zoochory* | 19, 30 |
| Nyctaginaceae | *Pisonia floribunda* | achene | brown |  |  | 1 |  |  | 8.41 | Zoochory* | 51, 53 |
| Opiliaceae | *Agonandra excelsa* | drupe | orange | 235.62 | 3.90 | 1 | 1.40 | 117.81 | 0.15 | Zoochory | 6, 19, 48 |
| Petiveriaceae | *Gallesia integrifolia* | samara | brown | 224.94 | 0.07 | 1 | 0.06 | 278.97 | 0.35 | Anemochory | 19, *in situ* |
| Polygonaceae | *Coccoloba ruiziana* | drupe | blue | 22.76 | 0.11 | 1 | 0.03 | 15.63 | 0.04 | Zoochory | 19, *in situ* |
| Polygonaceae | *Triplaris cumingiana* | achene | brown | 314.16 | 0.08 | 1 | 0.14 | 25.03 | 0.08 | Anemochory | 19, 31, 47, 49 |
| Rhamnaceae | *Zizyphus thyrsiflora* | drupe | yellow | 5.89 | 4.80 | 1 | 1.09 | 120.15 | 1.43 | Zoochory | 19, 31, 52 |
| Rubiaceae | *Randia armata* | berry | brown | 200.46 | 0.83 | 10 | 0.10 | 28.03 | 12.85 | Zoochory | 19, *in situ* |
| Rubiaceae | *Simira ecuadorensis* | capsule | brown | 1344.11 | 40.14 | 48 | 0.06 | 181.52 | 118.40 | Anemochory | 19, *in situ,* GB |
| Salicaceae | *Prockia crucis* | berry | red | 16.92 | 0.53 | 12 | 0.00 | 0.82 | 0.96 | Zoochory | 19, *in situ* |
| Sapindaceae | *Sapindus saponaria* | drupe | yellow | 122.72 | 3.14 | 1 | 1.40 | 142.56 | 0.08 | Zoochory | 19, *in situ,* GB |
| Sapindaceae | *Spondias purpurea* | drupe | yellow | 1030.44 | 21.90 | 5 | 3.20 | 518.36 | 0.08 | Zoochory |  |
| Solanaceae | *Acnistus arborescens* | berry | orange | 72.74 | 0.67 | 18 | 0.01 | 7.87 | 4.51 | Zoochory | 19, *in situ* |
| Verbeceae | *Citharexylum poeppigii* | drupe | red | 90.15 | 0.82 | 2 | 0.28 | 27.77 | 0.23 | Zoochory | 19, *in situ* |

*Epizoochory

**REFERENCES**

1. Aguirre, Z., 2012. Especies forestales de los bosques secos del Ecuador. Guía dendrológica para su identificación y caracterización. Proyecto Manejo Forestal Sostenible ante el Cambio Climático. MAE/FAO-Finlandia. Quito, Ecuador.
2. Alvarado, M.A., Rahim, F.P., Enrique-Jurado, E., Alejandra-Rocha, E., 2004. Caracterización morfológica y nutricional del fruto de anacahuita (*Cordia boissieri* A. DC.) en dos localidades del Noreste de México. Phyton (Buenos Aires). 73, 85-90.
3. Athiê, S., Martins, M., 2011. Consumo dos frutos de *Trichilia claussenii* C. DC. (Meliaceae) por aves em área de reflorestamento misto em Rio Claro, São Paulo. Revista Brasileira de Zoociências. 13 (1, 2, 3), 33-40.
4. Augspurger, C.K, 1986. Morphology and dispersal potential of wind-dispersal diasporas of Neotropical Tress. American Journal of Botany. 73(3), 353-363.
5. Betancourt, B.G., Guevara, M., 1998. Mecanismos de dispersión de especies xerófitas. Saber. 10 (1), 41-46.
6. Burkart, A., 1948. Las especies de Mimosa de la Flora Argentina. Darwiniana. 8 (1), 9-231.
7. Cardonoso, L., Ferreira da Costa, A., Dunn D.S., Pereira, J.P., 2011. Ulmaceae, Cannabaceae e Urticaceae das restingas do estado do Rio de Janeiro. Rodriguésia. 62(2), 299-313.
8. De Arruda, F.P., Beltrão, N.E., Pereira, A., Pereira, W.E., Soares, L., 2004. Cultivo de pinhão manso (*Jatropha curca* L.) como alternativa para o semi-árido nordestino. Revista brasileira de oleaginosas e fibrosas. 8 (1), 789- 799.
9. Fernández, J., 2003. Bombacaceae neotropicae novae vel minus cognitae VI. Novedades en los géneros Cavanillesia, Eriotheca, Matisia y Pachira. Revista de la Academia colombiana de ciencias exactas, físicas y naturales. 27 (102), 25-37.
10. Funk, V.A., Roque, N., 2011. The monotypic Andean genus *Fulcaldea* (Compositae, Barnadesioideae) gains a new species from northeastern Brazil. Taxon. 60 (4), 1095–1103.
11. Gentry, A., 1993. A field guide to woody plants of northwest of South America. Chicago**.**
12. Germán-Ramírez, M., 2005. Flora del Valle de Tehuacán-Cuicatlán: Fascículo 42. Malvaceae. Departamento de Botánica Instituto de Biología, UNAM.
13. Henrickson, J., 2010. Comments on a revision of *Celtis* Subgenus Mertensia (Celtidaceae) and Recognition of *Celtis padilla*. Journal of the Botanical Research Institute of Texas. 4 (1), 287-293.
14. Hernández, R.M., Carrillo, M.L., Reyes, A., 2011. PUAM (*Muntingia calabura*): Potencial antioxidante y antimicrobiano. TLATEMOANI (Revista Académica de Investigación). 8, 3-15.
15. Hernández-Ledesma, P., Flores, H., 2003. Nyctaginaceae de Hidalgo, México. Anales del Instituto de Biología, Universidad Nacional Autónoma de México. Serie Botánica. 74 (2), 231-287.
16. Hiepko, P., 2000. Opiliaceae. Flora Neotropica. Tomo 28.
17. Ibarra-Manríquez, G., Cornero-Tenorio, G., 2010. Diversidad de frutos de los árboles del bosque tropical perennifolio de México. Acta Botánica Mexicana. 90, 51-104.
18. Ibarra-Manríquez, G., Oyama, K., 1992. Ecological Correlates of Reproductive Traits of Mexican Rain Forest Trees. American Journal of Botany. 79 (4), 383-394**.**
19. Jara-Guerrero, A., De la Cruz, M., Méndez, M., 2011. Seed Dispersal of Woody species in South Ecuadorian Dry forest: Environmental Correlates and the Effect of considering species abundance. Biotropica. 43, 722 - 730. doi: 10.1111/j.1744-7429.2011.00754.x
20. Jiménez-Zurita, J.O., Balois-Morales, R., Alia-Tejacal, I., Juárez-López, P., Sumaya-Martínez, M.T., Bello-Lara, J., 2016. Caracterización de frutos de guanabana (*Annona muricata* L.) en Tepic, Nayarit, México. Revista Mexicana de Ciencias Agrícolas. 7 (6), 1261-1270.
21. Khan, D., Javed, M., 2016. Size variation and surface structure of pods and seed of *Bauhinia racemosa* Lamk. Fuuast J. Biol. 6 (1), 73-80.
22. Kiesling, R., 1982. Problemas nomenclaturales en el género *Cereus* (Cactaceae). Darwiniana. 24 (1/4), 443-453.
23. Leite, A.P., Ferreira, S., Mariano, R., Forlin, T., Viera, K., Souza, T. M., Merquides, L., 2010. Biometria de frutos e sementes de *Tabebuia chrysotricha* utilizado na arborização da cidade de Chapadão do Sul-MS. VI Simpósio de Meio Ambiente, Viçosa.
24. Limongi-Andrade, R., 2012. Moral fino (*Malucra tinctoria* (L.).D. Don ex Steud). Especie de uso múltiple del Bosque seco del Ecuador. Estación Experimental Portoviejo. Estación Experimental Litoral Sur. Programa Nacional de Forestería. Boletín Técnico N° 151 INIAP-MAGAP-SENESCYT. Editorial Grafiservi. Guayaquil, Ecuador.
25. Limongi-Andrade, R., Guiracocha, G., Yepez, C., 2011., Amarillo de Guayaquil (*Centrolobium ochroxylum*) Rose ex Rudd) especie de uso múltiple del bosque seco del Ecuador: Boletín técnico 148. INIAP. Experimentales del Litoral Sur & Portoviejo-MAGAP-SENESCYT. Editorial Cgraf. Manta Ec.
26. Lopes, J.A., Pinto Júnior, A.S., Steiner, F., Zoz, T., Contro-Malavasi, U., De Matos-Malavasi, M., Guimarães, V.F., 2010. Physiological maturity of seeds and colorimetry of fruits of *Jatropha curcas* L. Revista Brasileira de Sementes. 32(4), 158-165.
27. Miller, J.S., 2013. A Revision of *Cordia* section *gerascanthus* (Boraginales: Cordiaceae). Botanical Research Institute of Texas. 7 (1), 55-83
28. Ordoñez, O., 2016. Estudio fenológico de *Colicodendron scadridum* Kunth y *Cynophalla mollis* Kunth en la Reserva Ecológica Arenillas. Tesis. Universidad Técnica Particular de Loja. Loja, Ecuador.
29. Ragusa-Netto, J., 2013. Crop damage of *Eriotheca gracilipes* (Bombacaceae) by the Blue-Fronted Amazon (*Amazona aestiva*, Psittacidae), in the Brazilian Cerrado. Braz. J. Biol. 74 (4), 837-843. doi.org/10.1590/1519-6984.04713
30. Ramírez, N., 1993. Producción y costo de frutos y semillas entre formas de vida. Biotropica. 25 (1), 46-60.
31. Romero-Saritama, J.M., Pérez-Ruíz, C., 2016. Rasgos morfológicos regenerativos en una comunidad de especies leñosas en un bosque seco tropical tumbesino. Biología Tropical. 64 (2), 859-873.
32. Ruiz, A., Santos, M., Cavelier, J., 2000. Estudio Fenológico de Cactáceas en el Enclave Seco de la Tatacoa, Colombia. Biotropica. 32(3), 397–407.
33. Salazar, R., Soihet, C., Méndez, J., M. 2000. Manejo de semillas de 100 especies forestales de América Latina. Centro Agronómico de Investigación y Enseñanza (CATIE), Turrialba, Costa Rica.
34. Silva Junior, V.T, Lima, J.M., Rodrigues, C.W, Barbosa, D.C., 2012. *Erythrina velutina* willd (Leguminosae-Papilionoideae) occurring in Caatinga and Brejo de altitude of Pernambuco: biometrics, imbibition and germination. Revista Árvore. 36 (2), 247-257.
35. Silva, K.B., Alves, E.U., Bruno, R.L.A., Alcantara, R., Matos, B., Gonçalves, E.P, 2008. Morfología de frutos, sementes, plántulas e plantas de *Erythrina velutina* Willd., LEGUMINOSEAE - PAPILIONIDEAE. Revista Brasileira de Sementes. 30 (3), 104-114.
36. Soares Neto, R.L., Gomes, J., 2015. Capparaceae no Rio Grande do Norte, Brasil. Rodriguésia. 66 (3), 847-857. doi: 10.1590/2175-7860201566312
37. Stevens. W.D., 2001. Flora de Nicaragua. Tomo I. Introducción Gimnospermas y Angiospermas. New York: Missouri Botanical Garden.
38. Stevens. W.D., 2001. Flora de Nicaragua. Tomo III. Introducción Gimnospermas y Angiospermas. New York: Missouri Botanical Garden.
39. Tamayo, F., 1945. Las especies argentinas del género *Machaerium*. Darwiniana. 7 (1), 120-137.
40. Tong, F., Medina, D., Esparza, D., 1991. Variabilidad en poblaciones de guayaba (*Psidium guajava* L.) del municipio Mara del estado Zulia. Revista de la Facultad de Agronomía (LUZ). 8 (1), 15-27.
41. Viveros, C., 2000. Variación de frutos y semillas entre árboles de una población ruderal de *Guazuma ulmifolia* Lambert (Sterculiaceae). Tesis. Universidad Veracruzana, Instituto de Genética Forestal, México.

**WEB REFERENCES:**

1. Árboles del Parque Nacional Sarigua y las Áreas secos de los alrededores. http://biogeodb.stri.si.edu/bioinformatics/sarigua/species/29 (accessed 23 May 2017)
2. Canabio. *Cochlospermum vitifolium* (Willd.) Spreng. http://www.conabio.gob.mx/conocimiento/info_especies/arboles/doctos/25-cochl1m.pdf (accessed 20 May 2017)
3. Canabio. *Muntingia calabura* L. http://www.conabio.gob.mx/conocimiento/info_especies/arboles/doctos/32-elaeo1m.pdf (accessed 20 May 2017)
4. Canabio. *Tecoma stans* (L.) Juss. ex Kunth. http://www.conabio.gob.mx/conocimiento/info_especies/arboles/doctos/12-bigno8m.PDF (accessed 20 May 2017)
5. Flora de Nicaragua. http://www.tropicos.org/Name/13031778?projectid=7 (accessed 25 May 2017)
6. Flora of Barro Colorado Island. http://biogeodb.stri.si.edu/bioinformatics/croat/specie/Triplaris%20cumingiana,e,n (accessed 25 May 2017)
7. Fundación ProYungas. http://www.ambienteforestalnoa.org.ar/userfiles/especies/pdf/Agonandraexcelsa.pdf (accessed 23 May 2017)
8. Global Plants JSTOR. http://plants.jstor.org/search?genus=Triplaris&species=cumingiana (accessed 25 May 2017)
9. Journalist-Scientific photographer. http://www.photomazza.com/?Bougainvillea-glabra&lang=es (accessed 28 May 2017)
10. Manual de especies nativas y endémicas de Galápagos para la restauración ecológica en la zona agropecuaria. 2008. www.flascoandes.edu.ec (accessed 01 June 2017)
11. Martínez-Font, R., Melparejo, P., Legua, P, Hernández, F., Martínez J., 2009. Evaluación preliminar de cultivares de jinjolero (Zizyphus jujuba). 176-178. VI Congreso Iberico de Ciencias Horticolas. http://www.sech.info/ACTAS/Acta%20n%C2%BA%2054.%20VI%20Congreso%20Ib%C3%A9rico%20de%20Ciencias%20Hort%C3%ADcolas.%20XII%20Congreso%20Nacional%20de%20Ciencias%20Hort%C3%ADcolas/Comunicaciones/Evaluaci%C3%B3n%20preliminar%20de%20cultivares%20de%20jinjolero%20(Ziziphus%20jujuba).pdf (accessed 21 May 2017)
12. McMullen. C. 1999. Flowering plants of the Galápagos. 370 pp. https://books.google.com.ec/books?id=ucvFdpS2tBMC&dq=Pisonia+floribunda&hl=es&source=gbs_navlinks_s (accessed 01 June 2017)
13. Naturalista. http://www.naturalista.mx/taxa/274167-Mimosa-acantholoba (accessed 01 June 2017)
14. Queensland Government. https://www.business.qld.gov.au/industries/farms-fishing-forestry/agriculture/land-management/health-pests-weeds-diseases/weeds-diseases/invasive-plants/restricted/mimosa-pigra. (accessed 01 June 2017)

**Table S2.** Fruits consumed and dispersed by different frugivorous groups in the SDTF of Zapotillo.

| Species | Disperser groups | | | | |  |
| --- | --- | --- | --- | --- | --- | --- |
| **Birds** | **Micro-mammals** | **Reptiles** | **Non-ungulate** | **Ungulate** | **Ref.** |
| *Achatocarpus pubescens* | x |  |  |  |  | 23 |
| *Acnistus arborescens* | x |  |  |  |  | 19 |
| *Agonandra excelsa* |  | x |  | x |  | 32 |
| *Annona muricata* |  | x | x | x |  | 7, 10, 28 |
| *Bursera graveolens* | x |  |  |  |  | 19 |
| *Caesalpinia glabrata* |  |  |  |  | x | 17 |
| *Carica parviflora* | x |  |  |  |  | 19 |
| *Celtis iguanaea* | x |  | x | x |  | 11, 25, 28, 30 |
| *Celtis loxensis* | x |  | x | x |  | 11, 28, 30 |
| *Cereus diffusus* | x | x | x |  |  | 5, 13, 33 |
| *Chloroleucon mangense* |  |  |  |  | x | 17 |
| *Citharexylum poeppigii* | x |  | x |  |  | 5, 22 |
| *Coccoloba ruiziana* | x |  |  |  |  | 23 |
| *Colicodendron scabridum* |  |  |  | x |  | 6 |
| *Cordia lutea* | x |  | x | x |  | 3, 6, 14 |
| *Cynophalla flexuosa* |  |  |  | x |  | 29 |
| *Erythroxylum glaucum* | x |  |  | x |  | 7, 30 |
| *Ficus jacobii* | x | x |  | x |  | 20, 26 |
| *Ficus obtusifolia* | x | x |  | x |  | 1, 12, 30 |
| *Geoffroea spinosa* |  |  |  | x |  | 29 |
| *Guazuma ulmifolia* |  | x | x | x | x | 2, 10, 14, 27 |
| *Leucaena trichodes* |  |  |  |  | x | 17 |
| *Maclura tinctoria* | x | x |  |  |  | 21, 30 |
| *Muntingia calabura* | x | x |  | x |  | 6, 19, 24 |
| *Piptadenia flava* |  |  |  |  | x | 17 |
| *Pithecellobium excelsum* | x |  | x | x | x | 2, 3, 14, 23 |
| *Prockia crucis* | x |  |  |  |  | 16 |
| *Prosopis juliflora* | x | x | x | x |  | 3, 4, 25 |
| *Psidium guajaba* | x | x | x |  |  | 5, 21, 30 |
| *Randia armata* | x |  |  |  |  | 30 |
| *Sapindus saponaria* |  | x |  |  | x | 2, 9 |
| *Senna mollissima* |  |  |  |  | x | 17 |
| *Trichilia hirta* | x |  |  |  |  | 30 |
| *Vachellia macracantha* |  |  | x | x | x | 2, 6, 27 |
| *Ziziphus thyrsiflora* | x | x |  | x |  | 15 |

**REFERENCES**

1. Alves-Costa, C., Da Fonseca, G., Christófaro, C., 2004. Variation in the diet of the Brown-nosed coati (*Nasua nasua*) in southeastern Brazil. Journal of Mammalogy. 85 (3): 478–482.
2. Barreto, G., Hernandez O., Ojasti, J., 1997. Diet of peccaries (*Tayassua tajacu* and *T. pecari*) in a dry forest of Venezuela. J. Zool., Lond. 241: 279–284.
3. Benítez-Malvido, J., Tapia, E., Suazo, I., Villaseñor, E., Alvarado, J., 2003. Germination and seed damage in tropical dry forest plants ingested by iguanas. Journal of Herpetology. 37 (2): 301–308.
4. Campos, C., Ojeda, R., 1997. Dispersal and germination of *Prosopis flexuosa* (Fabaceae) seeds by desert mammals in Argentina. Journal of Arid Environments. 35: 707–714.
5. Castro, E.R., Galetti, M., 2004. Frugioria e Dispersão de sementes pelo lagarto teiú *Tupinambis merianae* (Reptilia: Teiidae). Papéis Avulsos de Zoologia. 44 (6): 91–97.
6. Cossíos, E., 2005. Dispersión y variación de la capacidad de germinación de semillas ingeridas por el zorro costeño (*Lycalopez sechurae*) en el Santuario Histórico Bosque de Pómac, Lambayaque. Tesis Magister Scientiae. Universidad Nacional Mayor de San Marcos. Facultad de Ciencias Biológicas. 81 pp.
7. Dalponte, J., Lima, E., 1999. Disponibilidade de frutos e a dieta de *Lycalopex vetulus* (Carnivora - Canidae) em um cerrado de Mato Grosso, Brasil. Revta brasil. Bot., São Paulo. 22 (2): 325–332.
8. De la Peña, M., Pensiero, J., 2003. Contribución de la flora en los hábitos alimentarios de las aves en un Bosque del centro de la Provincia de Santa Fe, Argentina. Ornitología Neotropical, 14: 499–513.
9. Dennis, A., A., Schupp, E., Green, R., Westcott, D., 2007. Seed dispersal: theory and its application in a changing world. London, UK.
10. Flores-Martínez, J., Ortega, J., Ibarra-Manríquez, G., 2000. El hábito alimentario del murciélago zapotero (*Artibeus jamaicensis*) en Yucatán. Revista Mexicana de Mastozoología. 4: 22–39.
11. García, E., 2016. Preferencias alimenticias y dispersión de semillas por grupos silvestres del tití cabeciblanco (*Saguinus oedipus*, Primates) en un Bosque Seco Tropical. Tesis para obtener el título M.Sc. Biología. Universidad Nacional de Colombia.
12. Gautier-Hion, A., Duplantier, J., Quris, R., Feer, F., Sourd, C., Decoux, J., Dubost, G., Emmons, L., Erard,C., Hecketsweiler, P., Moungazi, A., Roussilhon, C., Thiollay, J., 1985. Fruit characters as a basis of fruit choice and seed dispersal in a tropical forest vertebrate community. Oecología (Berlín). 65: 324–337.
13. Gomes, V., Quirino, Z., Araujo, H., 2004. Frugivory and seed dispersal by birds in *Cereus jamacaru* DC. Ssp. Jamacaru (Cactaceae) in the Caatinga of Northeastern Brazil. Braz. J. Biol. 74 (1): 32–40.
14. Guerrero, S., Badii, M., Zalapa, S., Flores, A., 2002. Dieta y nicho de alimentación del coyote, zorra gris, mapache y jaguarundi en un Bosque Tropical Caducifolio de la Costa Sur del Estado de Jalisco, México. Acta Zool. Mex. (n.s). 86:119–137.
15. Griz, L., Machado, C., 2001. Fruiting phenology and seed dispersal syndromes in Caatinga, a tropical dry forest in the northeast of Brazil. Journal of Tropical Ecology. 17: 303–321.
16. Janzen, D., 1983. No Park is an island: Increase in interference from outside as Park size decrease. Oikos. 41 (3), 402-410.
17. Jara-Guerrero, A., Escribano-Ávila, G., Espinosa, C.I., De la Cruz, M., Méndez, M., 2017. White-tailed deer as the last megafauna dispersing seeds in Neotropical dry forests: the role of fruit and seed traits. Biotropica. 50: 169–177. doi/10.1111/btp.12507
18. Marini, M., Cavalcanti, R., 1998. Frugivory by *Elaenia* Flycatchers. Hornero. 15: 47–50.
19. Martos, J., Scarpati, M., Rojas, C., Delgado, G., 2009. Fenología de algunas especies que son alimento para la pava aliblanca *Penelope albipennis*. Rev. peru. biol. 15(2): 051–058.
20. Medellin, R., Gaona, O., 1999. Seed dispersal by bats and birds in forest and disrurbed habitats of Chiapas, México. Biotropica. 31 (3): 478–485.
21. Mikich, S.B, 2002. A dieta dos morcegos frugívoros (Mammalia, Chiroptera, Phyllostomidade) de um pequeño remanescente de Floresta Estacional Semidecidual do sul do Brasil. Revta bras. Zool. 19 (1): 239–249.
22. Montaldo, N., 2005. Aves frugívoras de un relicto de Selva Subtropical Rivereña en Argentina: Manipulación de frutos y destino de las semillas. Hornero. 20 (2): 163–172.
23. Ortiz-Pulido, R., Laborde, J., Guevara, S., 2000. Frugivoría por aves en un paisaje fragmentado: consecuencias en la dispersión de semillas. Biotropica. 32 (3): 473–488.
24. Ruiz, A., Santos, M., Soriano, P.J., Cavelier, J., Cadena, A., 1997. Relaciones Mutualísticas entre el murciélago *Glossophaga longirostris* y las Cactáceas Columnares en la Zona Árida de La Tatacoa, Colombia. Biotropica. 29 (4): 469–479.
25. Salvador, S., 2017. Dieta del cacholote castaño, *Pseudoseisura lophotes* (Aves: Furnariidae), en Villa María, Córdoba, Argentina. Acta zoológica Lilloana. 61 (1):74–80.
26. Stevenson, P., Quiñones, M., Ahumada, J 2000. Influence of fruit availability on ecological overlap among four neotropical primates at Tinigua National Park, Colombia. Biotropica. 32 (3): 533–544.
27. Traveset, A., 1990. *Ctenosaura similis* Gray (Iguanidae) as a seed disperser in a central american deciduous forest. American Midland Naturalist. 123 (2): 402–404.
28. Van der Pijl., 1969. Principals of dispersal in higher plants. Springer-Verlag. Berlin-Heidelberg.
29. Varela, O., Cormenzana-Méndez, A., Krapovickas, E., 2008. Seasonal diet of the Pampas fox (*Lycalopex gymnocercus*) in the Chaco Dry Woodland, Northwestern Argentina. Journal of Mammalogy. 89 (4): 1012–1019. <https://doi.org/10.1644/07-MAMM-A-125.1>
30. Vargas, W., 2015. A brief description of the vegetation, with special emphasis on the intermediate pioneers of the dry forests of La Jagua, in the upper basin of the Magdalena River in Huila. Colombia Forestal. 18 (1): 47–70. doi.org/10.14483/udistrital.jour.colomb.for.2015.1.a03
31. Galetti M, Pizo MA, Morellato LPC. 2011. Diversity of functional traits of fleshy fruits in a species-rich Atlantic rain forest. Biota Neotrop 11:181–193. https://doi.org/10.1590/s1676-06032011000100019

**WEB REFERENCES:**

1. Frutos atrativos do cerrado. <http://frutosatrativosdocerrado.bio.br/76-especies/31-frutos-medio/318-pau-marfim> (accessed 25 January 2017)
2. Frutos atrativos do cerrado. <http://frutosatrativosdocerrado.bio.br/76-especies/32-frutos-grandes/414-mandacaru> (accessed 25 July2017)

**Table S3.** Output of the generalized linear models for plant traits associated with seed dispersal and chronic disturbance, elevation and interaction effects on the plant proportions.

1. **Fruit type**

|  | Achene | Berry | Capsule | Drupe | Pods | Samara | Syconium |
| --- | --- | --- | --- | --- | --- | --- | --- |
| ***Trees*** |  |  |  |  |  |  |  |
| Intercept | -3.32 *** | -1.80 *** | 0.10 | -1.38 *** | -2.28 *** | -0.49 * | -2.98 |
|  | [-4.12, -2.53] | [-2.77, -0.82] | [-0.17, 0.37] | [-1.66, -1.10] | [-2.58, -1.98] | [-0.93, -0.04] | [-6.14, 0.17] |
| Disturbance index | -0.51 | -6.77 *** | -1.47 *** | -1.01 *** | 3.82 *** | -3.88 *** | -9.95 * |
|  | [-2.24, 1.21] | [-9.30, -4.24] | [-2.06, -0.88] | [-1.52, -0.49] | [3.18, 4.47] | [-4.93, -2.83] | [-18.18, -1.73] |
| Elevation | -2.52 ** | -1.85 * | -0.50 * | -0.21 | 1.12 *** | -2.00 *** | -4.45 |
|  | [-4.05, -0.98] | [-3.40, -0.29] | [-0.95, -0.06] | [-0.55, 0.13] | [0.61, 1.64] | [-2.74, -1.26] | [-9.72, 0.82] |
| Index:Elevation | 9.70 *** | 12.07 *** | 1.70 ** |  | -6.90 *** | 8.24 *** | 21.63 ** |
|  | [5.77, 13.63] | [7.45, 16.69] | [0.43, 2.97] |  | [-8.36, -5.44] | [6.11, 10.38] | [6.89, 36.36] |
| N | 72 | 72 | 72 | 72 | 72 | 72 | 72 |
| AIC | 493.65 | 429.90 | 1087.35 | 873.32 | 1002.07 | 1675.56 | 99.75 |
| BIC | 502.76 | 439.01 | 1096.45 | 880.15 | 1011.17 | 1684.66 | 108.86 |
| Pseudo R2 | 0.58 | 0.79 | 0.46 | 0.22 | 0.99 | 0.76 | 0.33 |
| ***Trees and shrubs*** |  |  |  |  |  |  |  |
| Intercept | -3.44 *** | -2.88 *** | 1.03 *** | -2.36 *** | -2.55 *** | -1.70 *** | -4.12 *** |
|  | [-3.73, -3.15] | [-3.14, -2.61] | [0.90, 1.16] | [-2.57, -2.14] | [-2.70, -2.39] | [-1.95, -1.46] | [-5.95, -2.29] |
| Disturbance index | -0.18 | -0.50 | -2.04 *** | 0.25 | 3.23 *** | -2.11 ***  G4 | -8.52 *** |
|  | [-0.84, 0.48] | [-1.10, 0.10] | [-2.32, -1.76] | [-0.21, 0.70] | [2.91, 3.55] | [-2.68, -1.54] | [-13.30, -3.74] |
| Elevation | 1.21 *** | 0.70 ** | -1.98 *** | 0.91 *** | 1.29 *** | -0.64 ** | -3.21 * |
|  | [0.73, 1.68] | [0.26, 1.14] | [-2.20, -1.75] | [0.55, 1.27] | [1.01, 1.56] | [-1.07, -0.22] | [-6.35, -0.07] |
| Index:Elevation | 2.85 *** | 1.86 ** | 4.75 *** | -5.05 *** | -6.39 *** | 3.07 *** | 18.24 *** |
|  | [1.54, 4.17] | [0.62, 3.09] | [4.13, 5.37] | [-6.08, -4.02] | [-7.12, -5.65] | [1.86, 4.28] | [9.37, 27.11] |
| N | 72 | 72 | 72 | 72 | 72 | 72 | 72 |
| AIC | 2963.81 | 5162.80 | 6779.10 | 2050.48 | 5063.59 | 3979.61 | 219.34 |
| BIC | 2972.91 | 5171.91 | 6788.21 | 2059.59 | 5072.70 | 3988.72 | 228.45 |
| Pseudo R2 | 1.00 | 0.94 | 0.99 | 0.93 | 1.00 | 0.85 | 0.55 |
| | *** p < 0.001;  ** p < 0.01;  * p < 0.05. | | --- | | | | | | | | |

1. **Fruit color**

|  | Black | Blue | Brown | Green | Orange | Red | White | Yellow |
| --- | --- | --- | --- | --- | --- | --- | --- | --- |
| ***Trees*** |  |  |  |  |  |  |  |  |
| Intercept | -3.11 *** | -7.42 | 1.04 *** | -2.42 *** | -8.25 *** | -1.09 * | -0.68 | 0.01 |
|  | [-4.43, -1.78] | [-15.15, 0.30] | [0.71, 1.37] | [-2.77, -2.08] | [-12.13, -4.38] | [-2.09, -0.10] | [-3.18, 1.83] | [-0.88, 0.90] |
| Disturbance index | -2.74 | -5.1 | 1.47 *** | 0.64 | -1.02 | -5.83 *** | -13.32 *** | -11.66 *** |
|  | [-5.80, 0.33] | [-21.10, 10.89] | [0.72, 2.22] | [-0.11, 1.39] | [-8.11, 6.08] | [-8.25, -3.42] | [-20.42, -6.22] | [-14.16, -9.15] |
| Elevation | -3.69 ** | 0.16 | -0.79 ** | 2.19 *** | 2.58 | -5.72 *** | -5.87 ** | -3.87 *** |
|  | [-6.27, -1.11] | [-9.51, 9.84] | [-1.32, -0.26] | [1.65, 2.74] | [-1.63, 6.79] | [-7.69, -3.75] | [-10.27, -1.47] | [-5.32, -2.41] |
| Index:Elevation | 10.90 ** |  | -2.01 ** | -2.73 *** |  | 17.05 *** | 17.33 * | 18.84 *** |
|  | [4.01, 17.80] |  | [-3.54, -0.49] | [-4.29, -1.17] |  | [11.69, 22.41] | [3.27, 31.40] | [14.34, 23.35] |
| N | 72 | 72 | 72 | 72 | 72 | 72 | 72 | 72 |
| AIC | 281.95 | 14.94 | 762.57 | 776.8 | 37.83 | 401.56 | 145.94 | 387.69 |
| BIC | 291.06 | 21.77 | 771.67 | 785.9 | 44.66 | 410.67 | 155.04 | 396.8 |
| Pseudo R2 | 0.21 | 0.09 | 0.98 | 0.93 | 0.11 | 0.54 | 0.35 | 0.96 |
| ***Trees and Shrubs*** | |  |  |  |  |  |  |  |
| Intercept | -3.75 *** | -0.22 | 2.06 *** | -3.43 *** | -7.95 *** | -2.20 *** | -2.07 ** | -1.53 *** |
|  | [-4.54, -2.96] | [-13.78, 13.35] | [1.90, 2.22] | [-3.63, -3.23] | [-8.42, -7.48] | [-2.50, -1.90] | [-3.55, -0.60] | [-2.05, -1.00] |
| Disturbance index | -2.14 * | -29.87 | -0.50 ** | 1.81 *** | 4.26 *** | -1.17 *** | -10.62 *** | -9.11 *** |
|  | [-3.94, -0.34] | [-71.45, 11.70] | [-0.85, -0.15] | [1.39, 2.23] | [3.54, 4.98] | [-1.83, -0.51] | [-14.76, -6.48] | [-10.57, -7.65] |
| Elevation | -3.22 *** | -13.67 | -2.06 *** | 3.27 *** | 4.45 *** | -1.60 *** | -4.08 ** | -2.03 *** |
|  | [-4.82, -1.62] | [-39.08, 11.73] | [-2.32, -1.79] | [2.96, 3.59] | [4.01, 4.89] | [-2.17, -1.04] | [-6.69, -1.46] | [-2.89, -1.16] |
| Index:Elevation | 7.87 *** | 47.98 | 3.30 *** | -7.14 *** |  | 1.60 * | 10.20 * | 13.05 *** |
|  | [3.63, 12.11] | [-28.04, 123.99] | [2.56, 4.05] | [-8.03, -6.24] |  | [0.07, 3.14] | [1.69, 18.71] | [10.36, 15.73] |
| N | 72 | 72 | 72 | 72 | 72 | 72 | 72 | 72 |
| AIC | 640.94 | 26.91 | 2515.37 | 2013.91 | 1384.25 | 2188.46 | 351.43 | 858.41 |
| BIC | 650.05 | 36.02 | 2524.47 | 2023.01 | 1391.08 | 2197.56 | 360.54 | 867.51 |
| Pseudo R2 | 0.32 | 0.26 | 1 | 1 | 0.99 | 0.62 | 0.63 | 1 |
| *** p < 0.001;  ** p < 0.01;  * p < 0.05. | | | | | | | | |

1. **Dispersal syndrome**

|  | Anemochory | Autochory | Zoochory |
| --- | --- | --- | --- |
| ***Trees*** |  |  |  |
| Intercept | 1.20 *** | -3.41 *** | -1.23 *** |
|  | [0.92, 1.48] | [-3.83, -2.99] | [-1.59, -0.88] |
| Disturbance index | 0.1 | 1.51 *** | -1.30 ** |
|  | [-0.51, 0.71] | [0.65, 2.37] | [-2.09, -0.50] |
| Elevation | -0.85 *** | 1.51 *** | 0.4 |
|  | [-1.31, -0.39] | [0.86, 2.17] | [-0.16, 0.97] |
| Index:Elevation | -2.69 *** | 2.19 * | 0.84 |
|  | [-3.99, -1.39] | [0.43, 3.95] | [-0.80, 2.48] |
| N | 72 | 72 | 72 |
| AIC | 979.43 | 694 | 858.01 |
| BIC | 988.53 | 703.1 | 867.12 |
| Pseudo R2 | 0.95 | 0.88 | 0.77 |
| ***Trees and shurbs*** | | | |
| Intercept | 1.52 *** | -3.15 *** | -1.94 *** |
|  | [1.38, 1.66] | [-3.40, -2.90] | [-2.10, -1.78] |
| Disturbance index | -0.29 | -0.26 | 0.47 ** |
|  | [-0.60, 0.02] | [-0.83, 0.31] | [0.12, 0.82] |
| Elevation | -1.24 *** | 0.96 *** | 1.35 *** |
|  | [-1.49, -1.00] | [0.54, 1.38] | [1.07, 1.62] |
| Index:Elevation | -0.88 ** | 4.89 *** | -2.91 *** |
|  | [-1.55, -0.22] | [3.74, 6.04] | [-3.67, -2.14] |
| N | 72 | 72 | 72 |
| AIC | 5902.35 | 3583.29 | 4125.32 |
| BIC | 5911.45 | 3592.39 | 4134.43 |
| Pseudo R2 | 1 | 1 | 0.96 |

 *** p < 0.001;  ** p < 0.01;  * p < 0.05.

1. **Fruit traits**

|  | Fruit area | Fruit weight | N. seeds |
| --- | --- | --- | --- |
| ***Trees*** |  |  |  |
| Disturbance index | 0.5 | -2.15 * | -9.13 *** |
|  | [-0.44, 1.44] | [-4.16, -0.14] | [-13.64, -4.61] |
| Elevation | 0.28 | -0.17 | -12.29 *** |
|  | [-0.48, 1.05] | [-2.31, 1.97] | [-15.84, -8.73] |
| Index:Elevation | -1.7 | 4.61 | 22.00 *** |
|  | [-3.74, 0.33] | [-1.06, 10.28] | [12.51, 31.48] |
| N | 72 | 72 | 72 |
| AIC | 1079.59 | 456.4 | 725.32 |
| BIC | 1090.97 | 467.78 | 736.71 |
| Pseudo R2 | 0.07 | 0.18 | 0.2 |
| ***Trees and shrubs*** |  |  |  |
| Disturbance index | -2.33 | -4.64 *** | -7.38 *** |
|  | [-19.36, 14.71] | [-6.46, -2.82] | [-11.22, -3.54] |
| Elevation | -1.79 | -3.92 *** | -10.24 *** |
|  | [-12.80, 9.23] | [-5.70, -2.13] | [-13.16, -7.31] |
| Index:Elevation |  | 9.47 *** | 15.82 *** |
|  |  | [4.76, 14.19] | [8.12, 23.52] |
| N | 72 | 72 | 72 |
| AIC | 1123.91 | 538.99 | 678.99 |
| BIC | 1133.02 | 550.37 | 690.37 |
| Pseudo R2 | 0 | 0.1 | 0.35 |

 *** p < 0.001;  ** p < 0.01;  * p < 0.05.

1. **Seed traits**

|  | Seed area | Seed weight |
| --- | --- | --- |
| ***Trees*** |  |  |
| Disturbance index | -1.17 | -2.28 |
|  | [-2.43, 0.09] | [-5.37, 0.81] |
| Elevation | -1.82 *** | -2.13 |
|  | [-2.84, -0.80] | [-4.64, 0.37] |
| Index:Elevation | 3.66 * | 4.9 |
|  | [0.94, 6.38] | [-1.78, 11.59] |
| N | 72 | 72 |
| AIC | 734.1 | 47.94 |
| BIC | 745.49 | 59.33 |
| Pseudo R2 | 0.2 | 0.15 |
| ***Trees and shrubs*** |  |  |
| Disturbance index | -1.41 ** | -0.43 |
|  | [-2.42, -0.41] | [-0.99, 0.14] |
| Elevation | -2.15 *** | -0.32 |
|  | [-2.96, -1.33] | [-0.67, 0.04] |
| Index:Elevation | 4.10 *** |  |
|  | [1.93, 6.27] |  |
| N | 72 | 72 |
| AIC | 739.24 | -2.58 |
| BIC | 750.63 | 6.52 |
| Pseudo R2 | 0.3 | -0.59 |
| *** p < 0.001;  ** p < 0.01;  * p < 0.05. | | |

1. **Functional diversity of fruit traits**

|  | Fruit area | | | Fruit weight | | | Seed number per fruit | | |
| --- | --- | --- | --- | --- | --- | --- | --- | --- | --- |
|  | Functional richness | Functional evenness | Functional divergence | Functional richness | Functional evenness | functional divergence | Functional richness | Functional evenness | functional divergence |
| ***Trees*** |  |  |  |  |  |  |  |  |  |
| Disturbance index | -0.82 * | 0 | -0.23 | -0.77 | 0 | -2.26 | -0.34 | -0.20 ** | -0.25 *** |
|  | [-1.48, -0.15] | [-0.09, 0.08] | [-0.46, -0.00] | [-2.52, 0.98] | [-0.07, 0.06] | [-4.71, 0.20] | [-1.07, 0.38] | [-0.34, -0.06] | [-0.35, -0.14] |
| Elevation | 0 | -0.00 * | 0 | 0 |  | 0 | 0 | -0.00 * | -0.00 *** |
|  | [-0.00, 0.00] | [-0.00, -0.00] | [-0.00, 0.00] | [-0.01, 0.00] |  | [-0.01, 0.00] | [-0.00, 0.00] | [-0.00, -0.00] | [-0.00, -0.00] |
| Index:Elevation | 0 |  |  |  |  | 0 | 0 | 0.00 * | 0.00 *** |
|  | [-0.00, 0.00] |  |  |  |  | [-0.00, 0.01] | [-0.00, 0.00] | [0.00, 0.00] | [0.00, 0.00] |
| N | 72 | 72 | 72 | 72 | 72 | 72 | 72 | 72 | 72 |
| E8 |
| AIC | 162.63 | -79.38 | -99.93 | 7.7 | -90.78 | -352.32 | 24.61 | -134.76 | -197.44 |
| BIC | 174.01 | -70.27 | -90.83 | 16.8 | -83.95 | -340.93 | 35.99 | -123.38 | -186.06 |
| Pseudo R2 | 0.23 |  | -0.02 | 1.05 |  | 0 | 0.45 |  | -0.02 |
| R2 |  | 0.12 |  |  | 0 |  |  | 0.12 |  |
| ***Trees and shrubs*** |  |  |  |  |  |  |  |  |  |
| Disturbance index | -1.03 ** | 0.12 | -0.06 | -2.96 | 0.14 | -0.29 | -0.36 | -0.20 ** | -0.18 ** |
|  | [-1.63, -0.43] | [-0.06, 0.31] | [-0.19, 0.08] | [-6.51, 0.59] | [-0.30, 0.57] | [-1.12, 0.54] | [-1.13, 0.40] | [-0.34, -0.06] | [-0.29, -0.06] |
| Elevation | 0 | 0 | 0 | -0.01 * | 0 | -0.00 * | 0 | -0.00 * | -0.00 *** |
|  | [-0.00, 0.00] | [-0.00, 0.00] | [-0.00, 0.00] | [-0.01, -0.00] | [-0.00, 0.00] | [-0.00, -0.00] | [-0.00, 0.00] | [-0.00, -0.00] | [-0.00, -0.00] |
| Index:Elevation | 0.00 ** | 0 |  | 0 |  |  | 0 | 0 | 0.00 ** |
|  | [0.00, 0.00] | [-0.00, 0.00] |  | [-0.00, 0.01] |  |  | [-0.00, 0.00] | [-0.00, 0.00] | [0.00, 0.00] |
| N | 72 | 72 | 72 | 72 | 72 | 72 | 72 | 72 | 72 |
| AIC | 159.85 | -94.68 | -42.32 | 45.87 | -69.37 | -328.1 | 37.7 | -131.08 | -231.48 |
| BIC | 171.23 | -83.29 | -33.22 | 57.25 | -60.27 | -319 | 49.08 | -119.69 | -220.1 |
| Pseudo R2 | 0.36 |  | -0.09 | 0.3 | 0 | 0 | 0.34 |  | -0.01 |
| R2 |  | 0.21 |  |  |  |  |  | 0.12 |  |

 *** p < 0.001;  ** p < 0.01;  * p < 0.05.

1. **Functional diversity of seed traits**

|  | AS_FRic | AS_FEve | AS_FDis | PS_FRic | PS_FEve | PS_FDis |
| --- | --- | --- | --- | --- | --- | --- |
| ***Trees*** |  |  |  |  |  |  |
| Disturbance index | -0.16 | -0.19 | -1.04 * | -1 | -0.25 ** | -0.13 |
|  | [-1.29, 0.97] | [-0.39, 0.00] | [-2.01, -0.07] | [-2.47, 0.47] | [-0.41, -0.09] | [-0.28, 0.02] |
| Elevation | -0.00 * | -0.00 * | -0.00 ** | 0 | 0 | -0.00 * |
|  | [-0.00, -0.00] | [-0.00, -0.00] | [-0.00, -0.00] | [-0.00, 0.00] | [-0.00, 0.00] | [-0.00, -0.00] |
| Index:Elevation |  | 0.00 * | 0.00 * |  | 0.00 * | 0 |
|  |  | [0.00, 0.00] | [0.00, 0.00] |  | [0.00, 0.00] | [-0.00, 0.00] |
| N | 72 | 72 | 72 | 72 | 72 | 72 |
| R2 | 0.11 | 0.1 |  |  |  |  |
| AIC | 287.02 | -84.52 | 49.61 | 8.25 | -80.81 | -333.17 |
| BIC | 296.12 | -73.14 | 61 | 17.36 | -69.42 | -321.79 |
| Pseudo R2 |  |  | 0.36 | 0.95 | -0.08 | 0 |
| ***Trees and shrubs*** |  |  |  |  |  |  |
| Disturbance index | -0.09 | -0.21 * | -0.88 * | -1.42 | -0.22 ** | -0.07 |
|  | [-1.26, 1.07] | [-0.40, -0.03] | [-1.68, -0.07] | [-4.80, 1.96] | [-0.38, -0.07] | [-0.15, 0.01] |
| Elevation | -0.00 * | -0.00 * | -0.00 *** | 0 | 0 | -0.00 * |
|  | [-0.01, -0.00] | [-0.00, -0.00] | [-0.00, -0.00] | [-0.01, 0.00] | [-0.00, 0.00] | [-0.00, -0.00] |
| Index:Elevation |  | 0.00 ** | 0.00 * | 0 | 0 |  |
|  |  | [0.00, 0.00] | [0.00, 0.00] | [-0.00, 0.01] | [-0.00, 0.00] |  |
| N | 72 | 72 | 72 | 72 | 72 | 72 |
| R2 | 0.11 | 0.12 |  |  |  |  |
| AIC | 290.56 | -96.42 | 32.5 | 25.3 | -94.14 | -363.08 |
| BIC | 299.67 | -85.03 | 43.88 | 36.68 | -82.76 | -353.97 |
| Pseudo R2 |  |  | 0.5 | 0.28 | -0.06 | 0 |
| *** p < 0.001;  ** p < 0.01;  * p < 0.05. | | |  |  |  |  |

**h. Richness of trees and shrubs as resources for frugivorous.**

|  | Birds | Micromammals | Reptiles | Mammals - non ungulate | Ungulates |
| --- | --- | --- | --- | --- | --- |
| ***Trees*** |  |  |  |  |  |
| Disturbance index | -0.81 ** | -0.32 | -0.33 * | -0.41 ** | -0.03 |
|  | [-1.40, -0.22] | [-0.69, 0.06] | [-0.64, -0.01] | [-0.69, -0.12] | [-0.12, 0.06] |
| Elevation | -0.69 | 1.38 * | -0.42 | -0.29 |  |
|  | [-1.67, 0.29] | [0.09, 2.66] | [-0.94, 0.09] | [-0.76, 0.18] |  |
| Index:Elevation | 1.34 * | 1.44 | 0.66 * | 0.85 ** |  |
|  | [0.26, 2.41] | [-0.21, 3.10] | [0.10, 1.23] | [0.33, 1.37] |  |
| N | 72 | 72 | 72 | 72 | 72 |
| AIC | -43.93 | -318.69 | -16.61 | -30.09 | -46.3 |
| BIC | -32.54 | -307.31 | -5.23 | -18.71 | -39.47 |
| Pseudo R2 | -0.22 | 0 | -0.24 | -0.82 | -0.01 |
| ***Trees and shrubs*** | |  |  |  |  |
| Disturbance index | -0.20 * | 2.39 ** | 0.02 | -0.38 * | 0 |
|  | [-0.37, -0.03] | [0.86, 3.91] | [-0.08, 0.11] | [-0.68, -0.08] | [-0.10, 0.09] |
| Elevation | -0.17 |  |  | -0.3 |  |
|  | [-0.48, 0.14] |  |  | [-0.79, 0.20] |  |
| Index:Elevation | 0.37 * |  |  | 0.81 ** |  |
|  | [0.02, 0.71] |  |  | [0.27, 1.36] |  |
| N | 72 | 72 | 72 | 72 | 72 |
| AIC | -61.05 | -243.6 | -31.43 | -22.92 | -36.32 |
| BIC | -49.67 | -236.77 | -24.6 | -11.53 | -29.49 |
| Pseudo R2 | -0.07 | 0 | 0 | -0.72 | 0 |
| *** p < 0.001; ** p < 0.01; * p < 0.05. | | | | | |

**i. Abundance of trees and shrubs as resources for frugivorous.**

|  | Birds | Micromammals | Reptiles | Mammals - non ungulate | Ungulates |
| --- | --- | --- | --- | --- | --- |
| ***Trees*** |  |  |  |  |  |
| Disturbance index | -1.01 *** | 0.01 | 15.5 | -1.48 * | -2.04 ** |
|  | [-1.44, -0.59] | [-0.01, 0.03] | [-0.14, 31.14] | [-2.79, -0.17] | [-3.48, -0.60] |
| Elevation |  | 1.38 *** | 18.47 | -1.2 |  |
|  |  | [1.00, 1.76] | [-5.09, 42.02] | [-3.37, 0.97] |  |
| Index:Elevation |  |  | -25.84 * | 2.98 * |  |
|  |  |  | [-51.16, -0.51] | [0.59, 5.37] |  |
| N | 72 | 72 | 72 | 72 | 72 |
| AIC | -83.59 | -441.52 | -134.8 | -96.08 | -55.32 |
| BIC | -76.76 | -432.42 | -123.42 | -84.69 | -48.49 |
| Pseudo R2 | -0.13 | 0 | -0.01 | -0.03 | -0.05 |
| ***Trees and shrubs*** | |  |  |  |  |
| Disturbance index | -0.81 ** | -0.32 | -0.33 * | -0.41 ** | -0.03 |
|  | [-1.40, -0.22] | [-0.69, 0.06] | [-0.64, -0.01] | [-0.69, -0.12] | [-0.12, 0.06] |
| Elevation | -0.69 | 1.38 * | -0.42 | -0.29 |  |
|  | [-1.67, 0.29] | [0.09, 2.66] | [-0.94, 0.09] | [-0.76, 0.18] |  |
| Index:Elevation | 1.34 * | 1.44 | 0.66 * | 0.85 ** |  |
|  | [0.26, 2.41] | [-0.21, 3.10] | [0.10, 1.23] | [0.33, 1.37] |  |
| N | 72 | 72 | 72 | 72 | 72 |
| AIC | -43.93 | -318.69 | -16.61 | -30.09 | -46.3 |
| BIC | -32.54 | -307.31 | -5.23 | -18.71 | -39.47 |
| Pseudo R2 | -0.22 | 0 | -0.24 | -0.82 | -0.01 |
| *** p < 0.001; ** p < 0.01; * p < 0.05. | | | | | |
